# Supplementary material for: Diagnostic Accuracy of Contrast-enhanced Ultrasonography Liver Imaging Reporting and Data System in Hepatocellular Carcinoma: A Systematic Review
Source: Research Square preprint supplement (doi:10.21203/rs.3.rs-379866/v1), 2021-04-08
Supplement: Supplementary file 1 [file c2ab20c449777b381510de84.docx]

**Supplemental Materials:**

**Diagnostic Accuracy of Contrast-enhanced Ultrasonography Liver Imaging Reporting and Data System in Hepatocellular Carcinoma: A Systematic Review**

**Contents:**

**Appendix 1. Search strategies**

**Appendix 2.** **Results of QUADAS-2 quality assessment.**

**Appendix 3.** **Diagnostic performance of the LR-5 category for HCC**

**Appendix 4.** **Diagnostic performance of the LR-M category for non-HCC malignancy**

**Appendix 5.** **Hierarchical summary receiver operating characteristic curve**

**Appendix 6.** **Forest plots for each LI-RADS category**

**Appendix 7.** **Meta-regression results**

**Appendix 1. search strategies**

**Database: MEDLINE/Pubmed**, 2014 to April 2020

**Search Strategy**

1. (hepatocellular carcinoma* or hepatocellular neoplasm* or hepatocellular cancer or hepatic cell carcinoma* or HCC or cholangiocarcinoma* or hepatic nodule* or liver lesion* or adrenocortical carcinoma*).ti,ab.
2. Carcinoma, Hepatocellular/ or Cholangiocarcinoma/
3. liver imaging
4. Or/1-3
5. "liver imaging reporting and data system".tw,kw.
6. (LI-RADS or LIRADS or US LI-RADS).tw,kw.
7. (LR-1 or LR-2 or LR-3 or LR-4 or LR-5 or LR-M).tw.
8. 5 or 6
9. ultrasound or ultrasonogra* or US or CEUS or sonogra* or echogra* or echotomogra*
10. 4 and 7
11. 10 or 8
12. 11 and 9 (80 records)；

**Database: Cochrane,** 2014 to April 2020

**Search Strategy:**

1. Carcinoma, Hepatocellular
2. Liver Neoplasms
3. (hepatocellular carcinoma* or hepatocellular neoplasm* or hepatocellular cancer or hepatic cell carcinoma* or HCC or cholangiocarcinoma* or hepatic nodule* or liver lesion* or adrenocortical carcinoma*).tw,kw.
4. Or/1-3
5. "liver imaging reporting and data system".tw,kw.
6. (LI-RADS or LIRADS or US LI-RADS).tw,kw.
7. (LR-1 or LR-2 or LR-3 or LR-4 or LR-5 or LR-M).tw.
8. 5 OR 6
9. Ultrasonography
10. (ultrasound or ultrasonogra* or US or CEUS or sonogra* or echogra* or echotomogra*
11. 9 OR 10
12. 4 AND 7
13. 12 OR 8
14. 13 AND 11 (20 records)

**Database: Embase****,** 2014 to April 2020

**Search Strategy:**

1.‘exp liver cell carcinoma

2.  exp liver tumor/

3. hepatocellular carcinoma’ or ‘hepatoma’ or ‘hepatocarcinoma’ or ‘liver cell carcinoma’ or ‘hepatocellular neoplasm’ or ‘hepatocellular cancer’ or ‘hepatic cell carcinoma’ or ‘HCC’ or ‘cholangiocarcinoma’ or ‘hepatic nodule’ or ‘liver lesion’

4.1 OR 2 OR 3

4. "liver imaging reporting and data system".tw,kw.

5. (LI-RADS or LIRADS).tw,kw.

6. (LR-1 or LR-2 or LR-3 or LR-4 or LR-5 or LR-M).tw.

7.or 4-5

8. exp echography/

9. exp ultrasound/

10. (ultrasound or ultrasonogra* or US or CEUS or sonogra* or echogra* or echotomogra*

11.or 8-10

12.4 and 6

13. 12 OR 7

14. 13 and 1 (121 records)

**Database:Web of science,** 2014 to April 2020

**Search Strategy:**

#9 TS=#8 AND #2 (93 records)

#8 TS=#6 OR #7

#7 TS=#1 AND #5

#6 TS=#3 OR #4

#5 TS=(LR-1 or LR-2 or LR-3 or LR-4 or LR-5 or LR-M)

#4 TS**=**(LI-RADS or LIRADS)

#3 TS=(liver imaging reporting and data system)

#2 TS=(ultrasound or ultrasonogra* or US or CEUS or sonogra* or echogra* or echotomogra*)

#1 TS=(((liver or hepato*) and (carcinom* or cancer* or neoplasm* or malign* or tumo*)) or HCC)

**Database: SinoMed CBM,** 2014 to April 2020

1. 肝细胞癌 OR 肝癌 OR 肝细胞性肝癌 OR 肝胆管细胞癌 OR 肝脏肿瘤 OR 肝结节 OR HCC

2. 主题词="肝细胞癌"[不加权:扩展]

3. liver imaging reporting and data system OR LI-RADS OR LIRADS OR 肝脏影像报告与数据系统

4. 超声造影 OR 超声 OR 超声检查 OR 肝脏超声造影

5. (#3) OR (#2) OR (#1) (8 records)

**Database: CNKI,** 2014 to April 2020

SU=‘肝细胞癌’+‘肝癌’+‘肝细胞性肝癌’+‘肝胆管细胞癌’+‘肝脏肿瘤’+‘肝结节’+ ‘HCC’ AND SU=‘liver imaging reporting and data system’+ ‘LI-RADS’+ ‘LIRADS’ + ‘肝脏影像报告与数据系统’ AND SU=‘超声造影’+‘超声’+‘超声检查’+‘肝脏超声造影’ (24 recoeds)

**Database: Chinese Technical Periodicals (VIP),** 2014 to April 2020

M=（肝癌+肝胆管细胞癌+hcc+hepatocellular carcinoma+hepatoma+liver cancer+liver neoplasms+肝恶性肿瘤+原发性肝细胞癌+肝脏恶性肿瘤+肝腺癌+肝肿瘤+肝细胞癌）AND （liver imaging reporting and data system+ LI-RADS + LIRADS + 肝脏影像报告与数据系统）AND （超声造影+超声+超声检查+肝脏超声造影）(4 records)

**Database: WANFANG,** 2014 to April 2020

主题:（ “肝细胞癌”+ “肝癌”+ “肝细胞性肝癌”+ “肝胆管细胞癌”+ “肝脏肿瘤”+ “肝结节”+ “HCC” ）AND 主题:（“liver imaging reporting and data system”+“LI-RADS” + “LIRADS”+“肝脏影像报告与数据系统”）AND 主题:（“超声造影”+“超声”+“超声检查”+“肝脏超声造影”）

(56 records)

**Appendix 2**. Results of QUADAS-2 quality assessment.


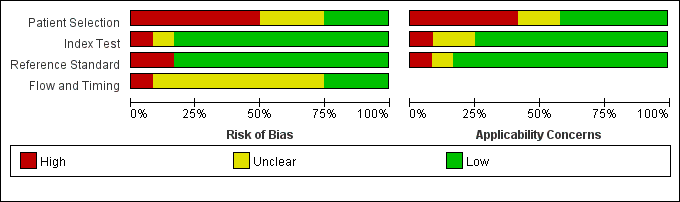


**Appendix 3.** Diagnostic performance of the LR-5 category for HCC

**
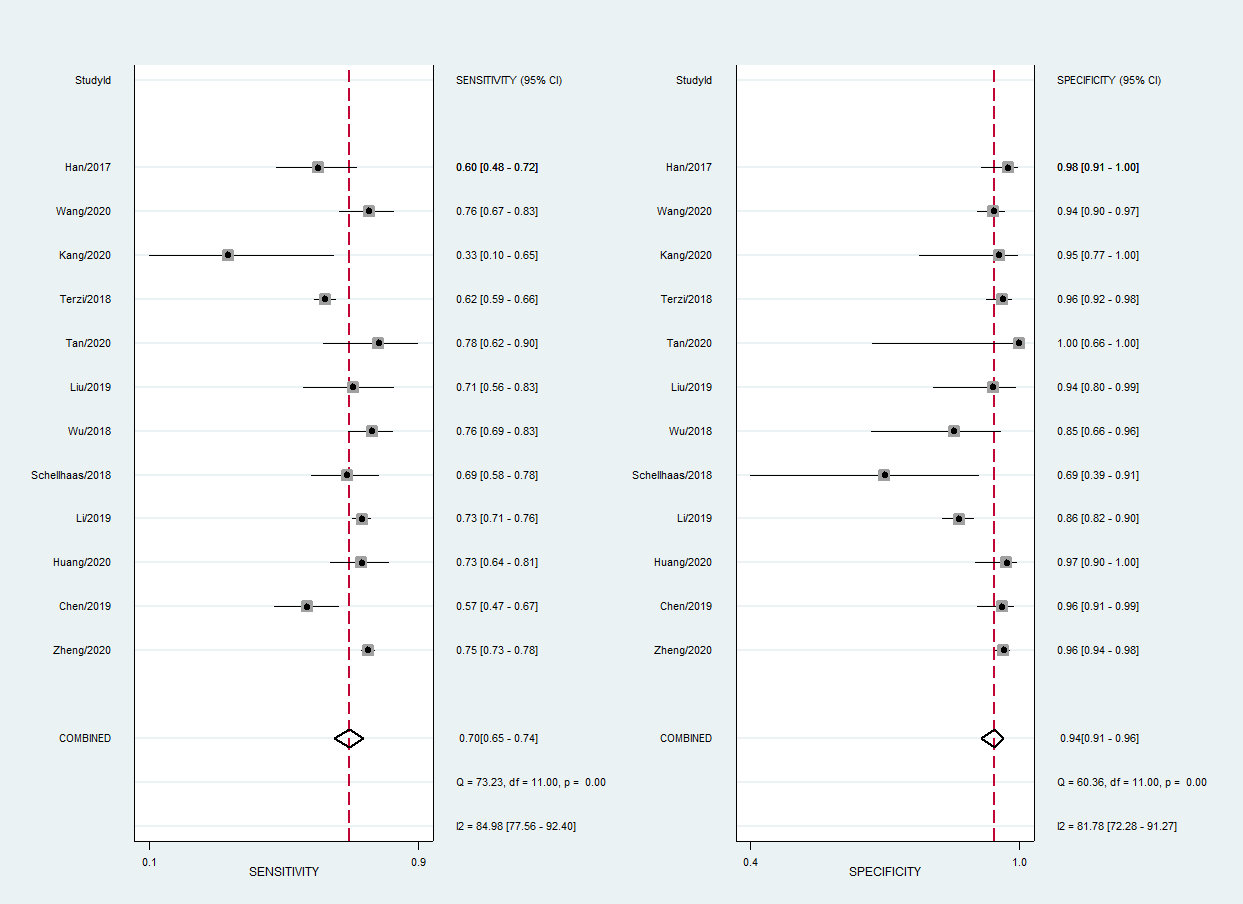
**

**Appendix 4.** Diagnostic performance of the LR-M category for non-HCC malignancy

**
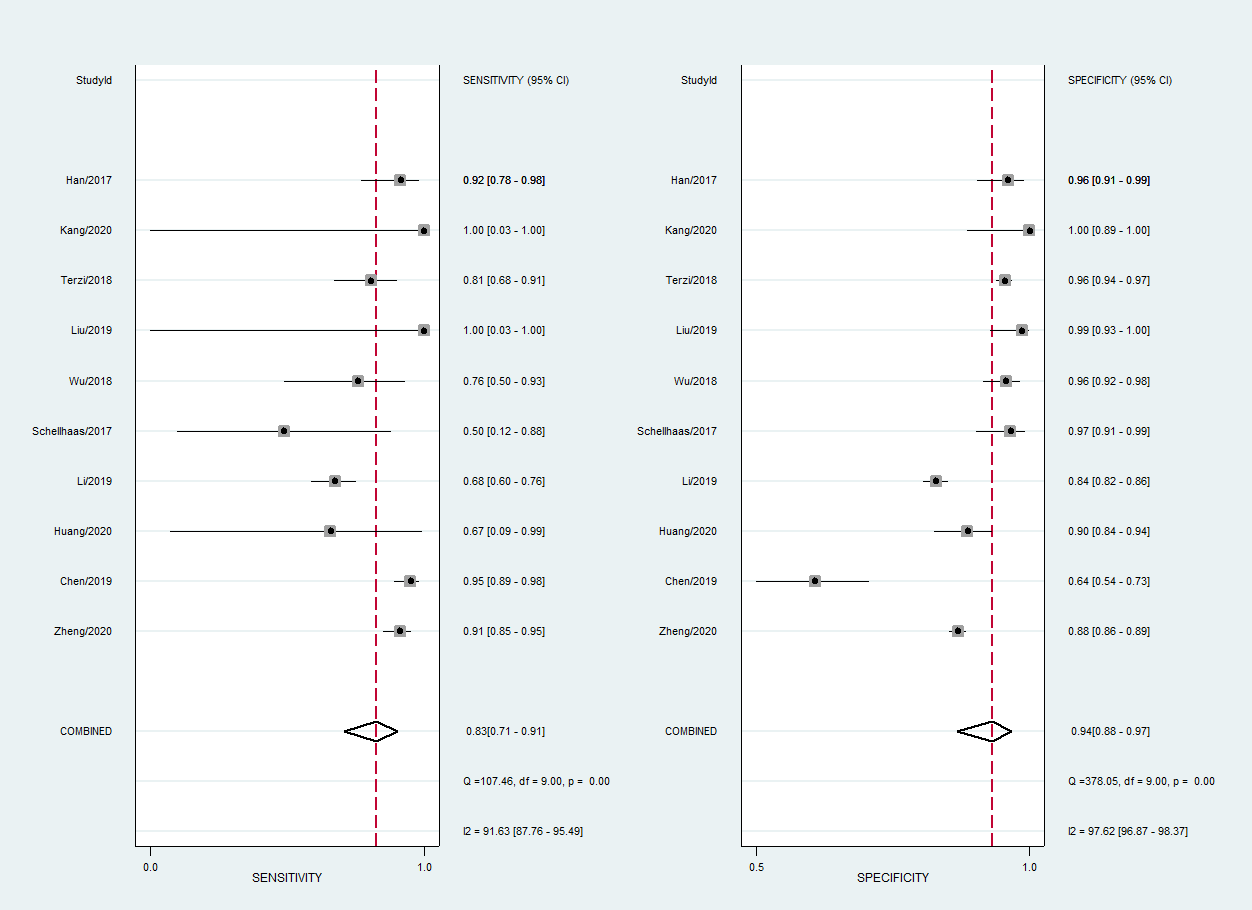
**

**Appendix 5.** Hierarchical summary receiver operating characteristic curve showing the performance of the LR-5 for diagnosing HCC.


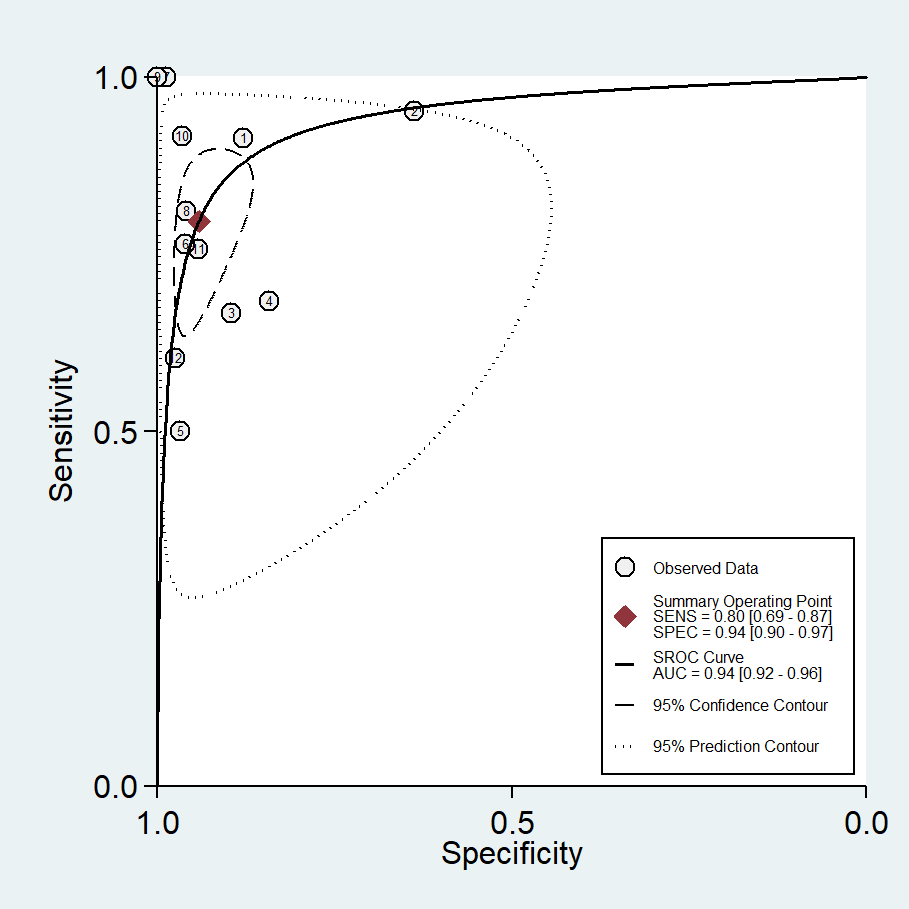


**Appendix 6.** Forest plots for each LI-RADS category

**LR-1 proportion of overall malignancy**

**

**

**LR-2 proportion of HCC**





**LR-2 proportion of overall malignancy**





**LR-3 proportion of HCC**





**LR-3 proportion of overall malignancy**

**

**

**LR-4 proportion of HCC**

**

**

**LR-4 proportion of overall malignancy**





**LR-5 proportion of HCC**

**

**

**LR-5 proportion of overall malignancy**





**LR-M proportion of HCC**

**

**

**LR-M proportion of overall malignancy**





**LR-TIV proportion of HCC**

**

**

**Appendix 7.** Meta-regression results

**LI-RADS 5 percentage of HCC (K=12)**

|  | estimate | SE | P | 95%CI |
| --- | --- | --- | --- | --- |
| intercept | 1.3313 | 0.0806 | <.0001 | 1.1733, 1.4893 |
| study design | -0.1566 | 0.0725 | 0.0308 | -0.2986, -0.0145 |
| Image reviewer | -0.2424 | 0.0622 | <.0001 | -0.3642, -0.1205 |
| LIRADS version | 0.0953 | 0.0846 | 0.2595 | -0.0704, 0.2611 |
| Reference standard | -0.0957 | 0.0376 | 0.0109 | -0.1694, -0.0220 |
| Subject enrollment | -0.1304 | 0.0700 | 0.0625 | -0.2676, 0.0068 |
| Nation of publication | 0.1215 | 0.0878 | 0.1662 | -0.0505, 0.2935 |

**LI-RADS 5 percentage of overall malignancy (K=12)**

|  | estimate | SE | P | 95%CI |
| --- | --- | --- | --- | --- |
| intercept | 1.4951 | 0.0942 | <.0001 | 1.3106, 1.6797 |
| study design | -0.1752 | 0.0943 | 0.0633 | -0.3600, 0.0097 |
| Image reviewer | -0.1879 | 0.0844 | 0.0260 | -0.3534, -0.0224 |
| LIRADS version | 0.0630 | 0.1020 | 0.5373 | -0.2630, 0.1370 |
| Reference standard | 0.0458 | 0.0598 | 0.4443 | -0.0715, 0.1631 |
| Subject enrollment | 0.0411 | 0.0883 | 0.6416 | -0.1320, 0.2142 |
| Nation of publication | -0.0181 | 0.1108 | 0.8701 | -0.2352, 0.1990 |

**LI-RADS 4 percentage of HCC (K=12)**

|  | estimate | SE | P | 95%CI |
| --- | --- | --- | --- | --- |
| intercept | 1.1882 | 0.2330 | <.0001 | 0.7316, 1.6448 |
| study design | -0.1013 | 0.2440 | 0.6779 | -0.5796, 0.3770 |
| Image reviewer | -0.7662 | 0.3618 | 0.0342 | -1.4753, -0.0571 |
| LIRADS version | -0.1602 | 0.2640 | 0.5440 | -0.6775, 0.3572 |
| Reference standard | 0.0846 | 0.1990 | 0.6709 | -0.3055, 0.4747 |
| Subject enrollment | -0.1786 | 0.2612 | 0.4942 | -0.6905, 0.3333 |
| Nation of publication | 0.1548 | 0.3019 | 0.6082 | -0.4370, 0.7465 |

**LI-RADS 4 percentage of overall malignancy (K=12)**

|  | estimate | SE | P | 95%CI |
| --- | --- | --- | --- | --- |
| intercept | 1.2505 | 0.2485 | <.0001 | 0.7635, 1.7376 |
| study design | -0.2383 | 0.2592 | 0.3578 | -0.7463, 0.2697 |
| Image reviewer | -0.3883 | 0.3746 | 0.3000 | -1.1226, 0.3460 |
| LIRADS version | -0.2077 | 0.2813 | 0.4603 | -0.7591, 0.3436 |
| Reference standard | 0.0808 | 0.2129 | 0.3793 | -0.3366, 0.4981 |
| Subject enrollment | 0.0026 | 0.2755 | 0.9924 | -0.5374, 0.5427 |
| Nation of publication | 0.1723 | 0.3230 | 0.5938 | -0.4608, 0.8054 |

**LI-RADS 3 percentage of HCC (K=12)**

|  | estimate | SE | P | 95%CI |
| --- | --- | --- | --- | --- |
| intercept | 0.8357 | 0.1855 | <.0001 | 0.4722, 1.1992 |
| study design | -0.1484 | 0.1847 | 0.4218 | -0.5105, 0.2137 |
| Image reviewer | 0.0017 | 0.1219 | 0.9887 | -1.2371, 0.2406 |
| LIRADS version | -0.4654 | 0.1956 | 0.0174 | -0.8489, -0.0820 |
| Reference standard | 0.0074 | 0.1138 | 0.9478 | -0.2156, 0.2305 |
| Subject enrollment | 0.4533 | 0.2269 | 0.0457 | 0.0087, 0.8980 |
| Nation of publication | -0.0584 | 0.2080 | 0.7790 | -0.4665, 0.3496 |

**LI-RADS 3 percentage of overall malignancy (K=12)**

|  | estimate | SE | P | 95%CI |
| --- | --- | --- | --- | --- |
| intercept | 0.8357 | 0.1895 | <.0001 | 0.4642, 1.2072 |
| study design | -0.0219 | 0.1905 | 0.9086 | -0.3953, 0.3516 |
| Image reviewer | -0.3883 | 0.3746 | 0.3000 | -1.1226, 0.3460 |
| LIRADS version | -0.4633 | 0.2007 | 0.0209 | -0.8566, -0.0700 |
| Reference standard | 0.0367 | 0.1202 | 0.7600 | -0.1988, 0.2723 |
| Subject enrollment | 0.3431 | 0.2333 | 0.1414 | -0.1142, 0.8005 |
| Nation of publication | -0.0243 | 0.2151 | 0.9099 | -0.4460, 0.3973 |

**LI-RADS M percentage of HCC (K=11)**

|  | estimate | SE | P | 95%CI |
| --- | --- | --- | --- | --- |
| intercept | -3.4965 | 1.0150 | 0.0006 | -5.4860, -1.5071 |
| study design | 0.0976 | 0.8459 | 0.9081 | -1.5603, 1.7556 |
| LIRADS version | 4.1096 | 1.0209 | <.0001 | 2.1088,6.1105 |
| Reference standard | -0.1135 | 0.1635 | 0.4878 | -0.4339, 0.2070 |
| Subject enrollment | -1.5807 | 0.2195 | <.0001 | -2.0109, -1.1505 |
| Nation of publication | 3.3989 | 1.0388 | 0.0011 | 1.3628,5.4350 |

**LI-RADS M percentage of overall malignancy (K=11)**

|  | estimate | SE | P | 95%CI |
| --- | --- | --- | --- | --- |
| intercept | 1.2632 | 0.2046 | <.0001 | 0.8621, 1.6642 |
| study design | -0.4568 | 0.2761 | 0.0980 | -0.9979, 0.0843 |
| LIRADS version | -0.0084 | 0.2412 | 0.9722 | -0.4812, 0.4644 |
| Reference standard | 0.0438 | 0.1918 | 0.8193 | -0.3322, 0.4198 |
| Subject enrollment | 0.1684 | 0.2223 | 0.4488 | -0.2673, 0.6041 |
| Nation of publication | 0.3613 | 0.2756 | 0.1899 | -0.1788, 0.9014 |

K represents the number of included studies in the meta-regression
